# Supplementary material for: GSTA4 mediates reduction of cisplatin ototoxicity in female mice
Source: PubMed Central journal article supplement (PMC6742643; doi:10.1038/s41467-019-12073-0), 2019-09-12
Supplement: 41467_2019_12073_MOESM1_ESM.pdf [file 41467_2019_12073_MOESM1_ESM.pdf]

## Supplementary Information

# GSTA4 Mediates Reduction of Cisplatin Ototoxicity in Female Mice

Hyo-Jin Park<sup>1,9</sup>, Mi-Jung Kim<sup>1,9</sup>, Christina Rothenberger<sup>1,9</sup>, Ashok Kumar<sup>2</sup>, Edith M. Sampson<sup>3</sup>, Dalian Ding<sup>4</sup>, Chul Han<sup>1</sup>, Karessa White<sup>1</sup>, Kevin Boyd<sup>1</sup>, Manohar Senthilvelan<sup>4</sup>, Yong-Hwan Kim<sup>5</sup>, Maria S. Ticsa<sup>1</sup>, Aaron S. Gomez<sup>1</sup>, Isabela Caicedo<sup>1</sup>, Upal Bose<sup>1</sup>, Paul J. Linser<sup>6</sup>, Takuya Miyakawa<sup>7</sup>, Masaru Tanokura<sup>7</sup>, Thomas C. Foster<sup>2</sup>, Richard Salvi<sup>4,8</sup>, and Shinichi Someya<sup>1,\*</sup>

<sup>1</sup>Department of Aging and Geriatric Research, University of Florida, Gainesville, FL, 32610, USA.

<sup>2</sup>Department of Neuroscience, University of Florida, Gainesville, FL, 32611, USA.

<sup>3</sup>Monoclonal Antibody Core, Interdisciplinary Center for Biotechnology Research, University of Florida, Gainesville, FL, 32610, USA

<sup>4</sup>Center for Hearing and Deafness, State University of New York at Buffalo, NY, 14214, USA.

<sup>5</sup>Department of Neurobiology, Barrow Neurological Institute, Phoenix, AZ, 85013, USA

<sup>6</sup>Whitney Laboratory, University of Florida, St Augustine, FL, 32080, USA.

<sup>7</sup>Department of Applied Biological Chemistry, University of Tokyo, Yayoi, Tokyo, 113-8657, Japan.

<sup>9</sup>These authors contributed equally to this work.

\*Correspondence and request for materials should be addressed to S. S. (someya@ufl.edu)

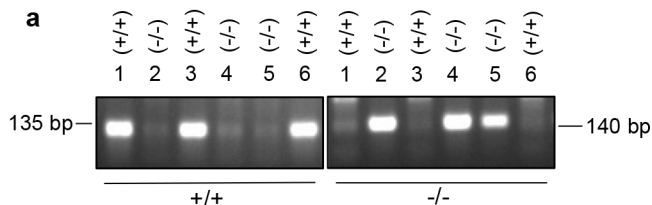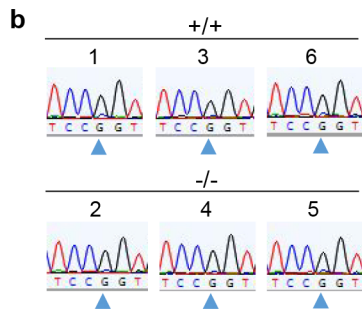

**Supplementary Fig. 1.** Genotyping of *Gsta4*<sup>+/+</sup>, *Gsta4*<sup>+/-</sup>, and *Gsta4*<sup>-/-</sup> mice. **a** PCR products were separated on a 1.5% agarose gel. The expected band sizes for the wild-type and mutant alleles were 135 and 140 bps, respectively. The full-length gel is presented in the Source Data file. **b** The *Cdh23* gene in three *Gsta4*<sup>+/+</sup> and three *Gsta4*<sup>-/-</sup> mice was sequenced. All the mice examined had the same wild-type *Cdh23*<sup>753G/753G</sup> genotype.

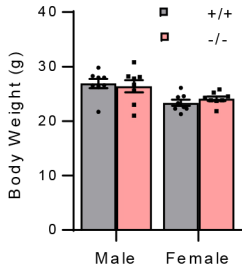

**Supplementary Fig. 2.** Assessment of body weight. The body weight of male and female  $Gsta4^{+/+}$  and  $Gsta4^{-/-}$  mice was measured at 3 months of age.  $n=8$ , error bars represent  $\pm$  s.e.m. Source data are provided as a Source Data file.

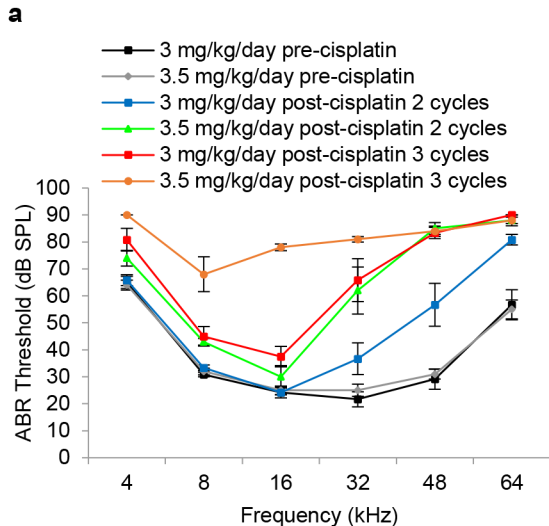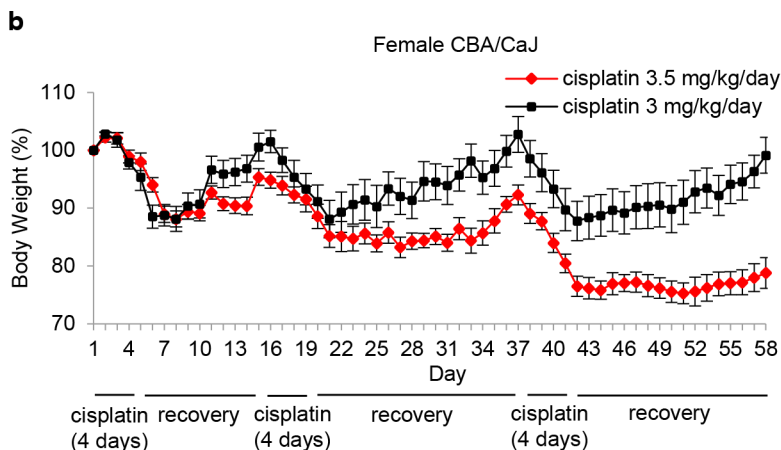

**Supplementary Fig. 3.** Assessment of ABR hearing thresholds. **a** ABR hearing thresholds were measured at 4, 8, 16, 32, 48 and 64 kHz prior to, after 2 cycles or 3 cycles of cisplatin treatment at 3.0 or 3.5 mg/kg/day of cisplatin. The quantification shows mean of at least five independent experiments ( $n = 5$ ), error bars represent  $\pm$  s.e.m. **b** The body weight of female CBA/CaJ mice was measured during cisplatin treatment. The quantification shows mean of at least five independent experiments ( $n = 5$ ), error bars represent  $\pm$  s.e.m. Source data are provided as a Source Data file.

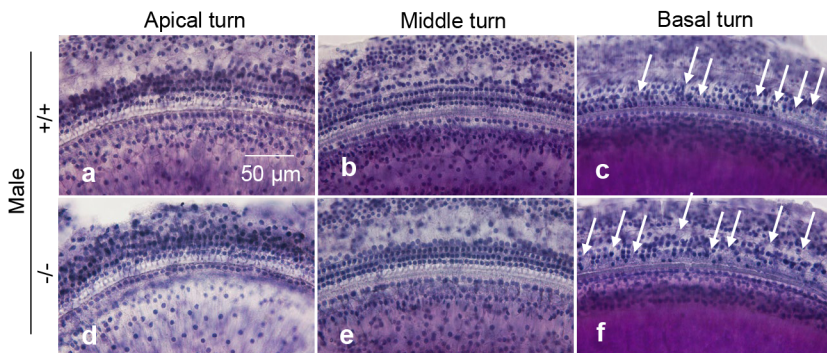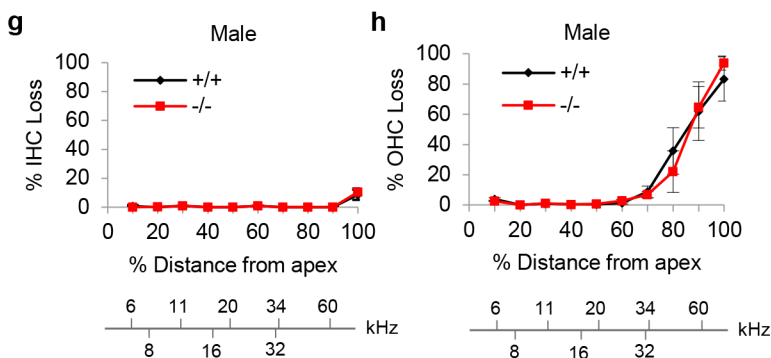

**Supplementary Fig. 4.** Cochleograms. **a-f**: Hair cell regions in the apical, middle and basal regions of cochlear basilar membranes from male *Gsta4*<sup>+/+</sup> and *Gsta4*<sup>-/-</sup> mice after cisplatin treatment. Arrows indicate missing hair cells. Scale bar = 50  $\mu$ m.

**g-h**: Cochleograms were recorded and averaged in the cochlear tissues of male *Gsta4*<sup>+/+</sup> and *Gsta4*<sup>-/-</sup> mice. Graphs show percent loss of IHCs (g) and OHCs (h) as function of percent distance from the apex. The quantification shows mean of at least five independent experiments ( $n = 4$ ), error bars represent  $\pm$  s.e.m. Lower x-axes show the frequency-place map for the mouse cochlea. Source data are provided as a Source Data file.

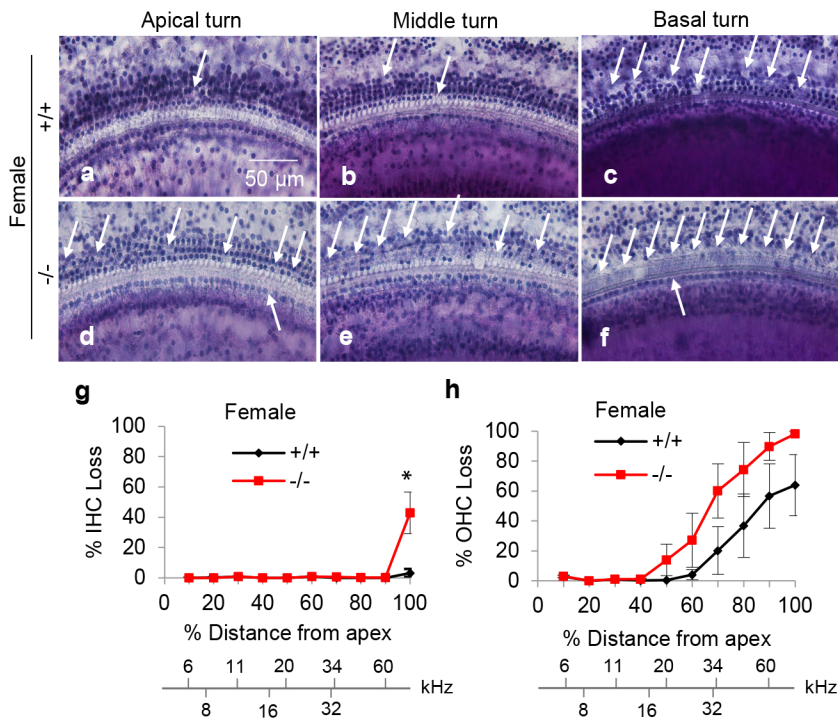

**Supplementary Fig. 5.** Cochleograms. **a-f:** Hair cell regions in the apical, middle and basal regions of cochlear basilar membranes from female *Gsta4*<sup>+/+</sup> and *Gsta4*<sup>-/-</sup> mice after cisplatin treatment. Arrows indicate missing hair cells. Scale bar = 50  $\mu\text{m}$ . **g-h:** Cochleograms were recorded and averaged in the cochlear tissues of female *Gsta4*<sup>+/+</sup> and *Gsta4*<sup>-/-</sup> mice. Graphs show percent loss of IHCs (g) and OHCs (h) as function of percent distance from the apex. The quantification shows mean of at least four independent experiments ( $n = 4$ ),  $*p < 0.05$  vs. *+/+* (two-way ANOVA), error bars represent  $\pm$  s.e.m. Lower x-axes show the frequency-place map for the mouse cochlea. Source data are provided as a Source Data file.

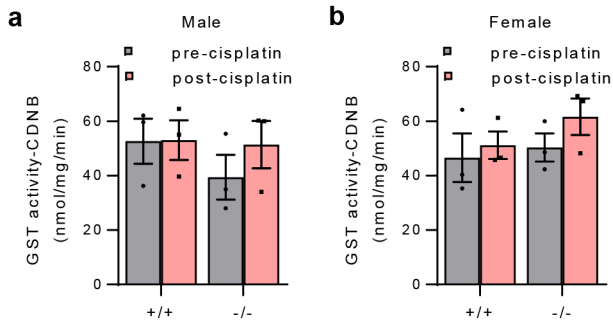

**Supplementary Fig. 6.** Assessment of GST activity. **a-b** GST activities toward CDNB were measured in the cytosol of inner ear tissues from males (**a**) and female (**b**) *Gsta4*<sup>+/+</sup> and *Gsta4*<sup>-/-</sup> mice prior to and after cisplatin treatment. *n*=3, error bars represent  $\pm$  s.e.m. Source data are provided as a Source Data file.

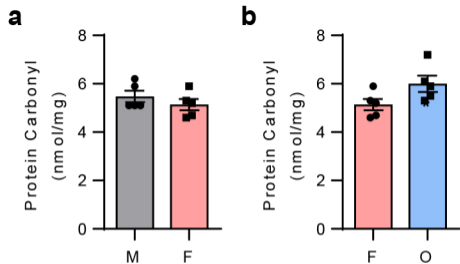

**Supplementary Fig. 7.** Assessment of oxidative protein damage. **a-b** Levels of protein carbonyl as an oxidative protein damage marker were measured in the inner ear tissues from male, female, and ovariectomized female *Gsta4*<sup>-/-</sup> mice. *n*=5, error bars represent  $\pm$  s.e.m. Source data are provided as a Source Data file.



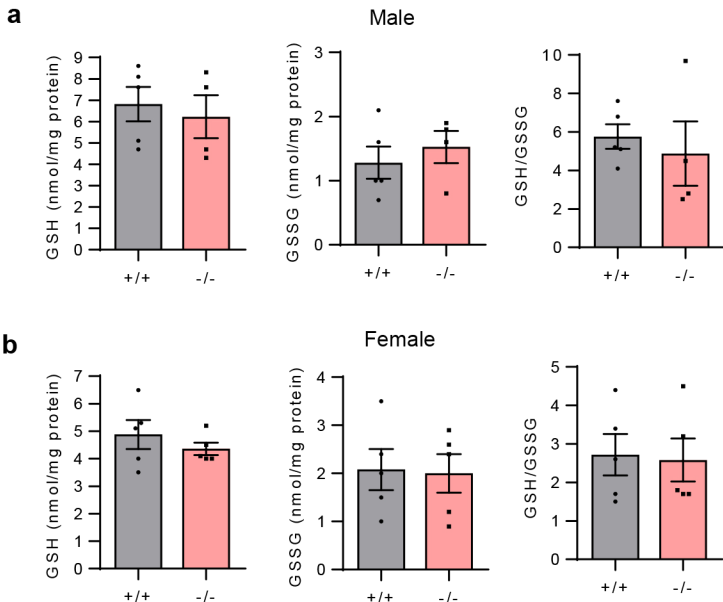

**Supplementary Fig. 8.** Assessment of glutathione redox status. **a-b:** Levels of GSH (left), GSSG (middle), and GSH/GSSG (right) were measured in the cytosol of inner ear tissues from males (**a**) and female (**b**) *Gsta4*<sup>+/+</sup> and *Gsta4*<sup>-/-</sup> mice after cisplatin treatment. The quantification shows mean of at least five independent experiments ( $n=4$ ), error bars represent  $\pm$  s.e.m. Source data are provided as a Source Data file.
